# Supplementary material
Source: PubMed Central journal article supplement (PMC5732069)

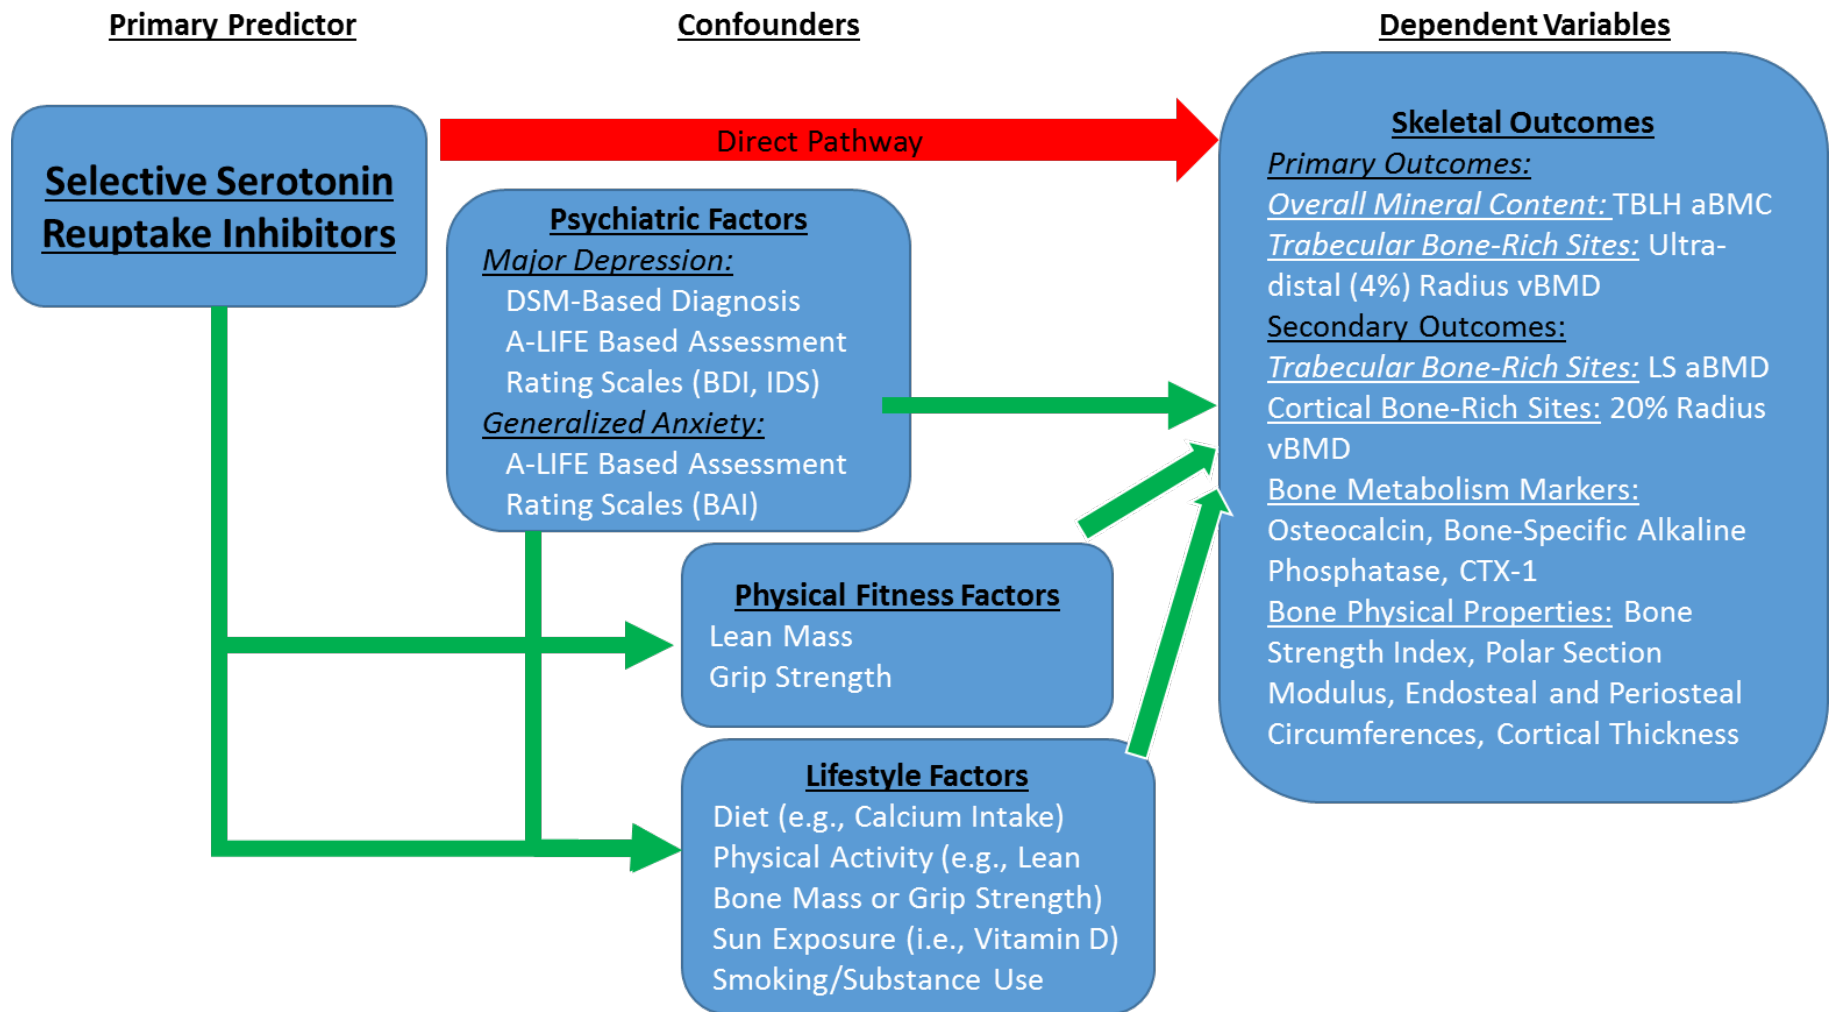

Supplement: NIHMS898352-supplement-S1.pdf [file NIHMS898352-supplement-S1.pdf]
